# Supplementary material for: Physical Activity and the Development of Post-Transplant Diabetes Mellitus, and Cardiovascular- and All-Cause Mortality in Renal Transplant Recipients
Source: PubMed Central journal article supplement (PMC7074375; doi:10.3390/jcm9020415), 2020-02-03
Supplement: jcm-09-00415-s001.pdf [file jcm-09-00415-s001.pdf]

## SUPPLEMENTARY MATERIALS

|            |                                                                                                                                        |
|------------|----------------------------------------------------------------------------------------------------------------------------------------|
| Contents   |                                                                                                                                        |
| Table S1   | Model 7 and separate adjustments for BMI and waist circumference in the associations of MVPA of with long-term health outcomes in RTRs |
| Table S2.  | Baseline characteristics of RTRs according to the presence of long-term health outcomes                                                |
| Figure S1. | Level of daily-life PA according to occupational status (A) and age (B).                                                               |

**Table S1.** Model 7 and separate adjustments for BMI and waist circumference in the associations of MVPA of with long-term health outcomes in RTRs

| Physical activity               | MVPA (cont.)     |        | No-MVPA (Ref) | MVPA-1            |        | MVPA-2            |        |
|---------------------------------|------------------|--------|---------------|-------------------|--------|-------------------|--------|
|                                 | HR (95% CI)      | P      |               | HR (95% CI)       | P      | HR (95% CI)       | P      |
| <b>Post-transplant DM</b>       |                  |        |               |                   |        |                   |        |
| Model 7                         | 0.88 (0.79-0.99) | 0.03   | 1.00          | 0.63 (0.31-1.25)  | 0.19   | 0.50 (0.25-1.03)  | 0.06   |
| Model 7A                        | 0.90 (0.80-0.99) | 0.043  | 1.00          | 0.63 (0.32-1.25)  | 0.19   | 0.55 (0.27-1.10)  | 0.09   |
| Model 7B                        | 0.89 (0.80-0.99) | 0.03   | 1.00          | 0.64 (0.32-1.287) | 0.21   | 0.52 (0.26-1.06)  | 0.07   |
| <b>Cardiovascular mortality</b> |                  |        |               |                   |        |                   |        |
| No. of events                   | 53/589           |        | 26            | 14                |        | 13                |        |
| Model 7                         | 0.85 (0.75-0.96) | 0.01   | 1.00          | 0.51 (0.23-1.11)  | 0.09   | 0.40 (0.17-0.92)  | 0.03   |
| Model 7A                        | 0.84 (0.74-0.94) | 0.001  | 1.00          | 0.46 (0.23-0.96)  | 0.04   | 0.35 (0.15-0.795) | 0.01   |
| Model 7B                        | 0.85 (0.75-0.97) | 0.01   | 1.00          | 0.51 (0.24-1.18)  | 0.09   | 0.40 (0.17-0.39)  | 0.03   |
| <b>All-cause mortality</b>      |                  |        |               |                   |        |                   |        |
| No. of events                   | 129/650          |        | 76            | 27                |        | 26                |        |
| Model 7                         | 0.84 (0.78-0.89) | <0.001 | 1.00          | 0.40 (0.25-0.63)  | <0.001 | 0.37 (0.23-0.59)  | <0.001 |
| Model 7A                        | 0.83 (0.78-0.89) | <0.001 | 1.00          | 0.39 (0.25-0.61)  | <0.001 | 0.37 (0.24-0.58)  | <0.001 |
| Model 7B                        | 0.84 (0.78-0.89) | <0.001 | 1.00          | 0.40 (0.25-0.64)  | <0.001 | 0.38 (0.24-0.60)  | <0.001 |

DM=Diabetes mellitus, MVPA=moderate-to-vigorous physical activity.

Model 7: model 1 + adjustment for BMI and waist circumference

Model 7A: model 1 + adjustment for BMI

Model 7B: model 1 + adjustment for waist circumference

**Table S2.** Baseline characteristics of RTRs according to the presence of long-term health outcomes

| Variables                      | Post-transplant diabetes mellitus |             | All-cause mortality |              |
|--------------------------------|-----------------------------------|-------------|---------------------|--------------|
|                                | Without                           | With        | Without             | With         |
|                                | (n=521)                           | (n=129)     | (n=449)             | (n=50)       |
| <b>General characteristics</b> |                                   |             |                     |              |
| Age (years)                    | 51.5 ± 13.4                       | 52.7 ± 10.9 | 50.9 ± 12.5         | 60.5 ± 10.5* |

|                                   |                 |                 |                 |                  |
|-----------------------------------|-----------------|-----------------|-----------------|------------------|
| Male gender (% , n)               | 56.7 (245)      | 62.3 (33)       | 56.1 (311)      | 59.2 (90)        |
| Current smoking (% , n)           | 12.0 (52)       | 20.8 (11)       | 11.9 (66)       | 11.8 (18)        |
| Alcohol use (g/day)               | 3.1 (0-12.4)    | 3.5 (0-10.0)    | 3.2 (0.0-11.6)  | 1.0 (0-6.5)*     |
| Total energy intake (kcal/d)      | 2203.1 ± 658.4  | 2205.9 ± 522.3  | 2203.2 ± 656.1  | 2035.1 ± 554.6*  |
| SBP (mm Hg)                       | 134.9 ± 17.0    | 141.4 ± 17.6*   | 135.4 ± 17.1    | 138.0 ± 18.9     |
| DBP (mm Hg)                       | 82.6 ± 10.9     | 87.0 ± 11.1*    | 82.9 ± 11.1     | 81.0 ± 10.8      |
| BMI (kg/m <sup>2</sup> )          | 25.8 ± 4.7      | 27.6 ± 4.7      | 26.5 ± 4.7      | 27.2 ± 5.1       |
| Waist in men (cm)                 | 98.4 ± 11.7     | 106.6 ± 13.6    | 100.3 ± 12.7    | 104.8 ± 15.6     |
| Waist in women (cm)               | 92.1 ± 15.6     | 99.6 ± 16.2     | 94.1 ± 15.6     | 98.6 ± 14.8*     |
| Total cholesterol (mmol/L)        | 5.1 ± 1.1       | 5.3 ± 1.3       | 5.1 ± 1.1       | 5.1 ± 1.3        |
| Triglyceride (mmol/L)             | 1.6 (1.2-2.1)   | 2.2 (1.4-3.1)*  | 1.7 (1.2-2.3)   | 1.9 (1.4-2.6)*   |
| HDL-C in men (mmol/L)             | 1.3 ± 0.4       | 1.1 ± 0.3*      | 1.3 ± 0.4       | 1.2 ± 0.4        |
| HDL-C in women (mmol/L)           | 1.6 ± 0.5       | 1.4 ± 0.3*      | 1.6 ± 0.5       | 1.4 ± 0.4*       |
| Kidney function                   |                 |                 |                 |                  |
| eGFR (mL/min/1.73m <sup>2</sup> ) | 53.0 ± 20.5     | 51.0 ± 16.8     | 54.0 ± 20.4     | 46.2 ± 19.1      |
| Albumin excretion (mg/24h)        | 269.1 ± 709.2   | 235.4 ± 625.0   | 230.1 ± 681.8   | 410.7 ± 833.7*   |
| Proteinuria (% , n)               | 20.4 (88)       | 20.8 (11)       | 19.0 (105)      | 34.9 (53)*       |
| Primary renal disease (% , n)     |                 |                 |                 |                  |
| Glomerulosclerosis                | 28.9 (125)      | 34.0 (18)*      | 29.8 (165)      | 21.7 (33)        |
| Glomerulonephritis                | 7.9 (34)        | 7.5 (4)         | 8.5 (47)        | 4.6 (7)          |
| Tubulointerstitial nephritis      | 12.5 (54)       | 11.3 (6)        | 12.6 (70)       | 9.2 (14)         |
| Polycystic kidney disease         | 22.5 (97)       | 17.0 (9)        | 19.9 (110)      | 24.3 (37)        |
| Renal hypodysplasia               | 3.7 (16)        | 3.8 (2)         | 4.2 (23)        | 3.9 (6)          |
| Renovascular diseases             | 5.1 (22)        | 5.7 (3)         | 5.6 (31)        | 5.9 (9)          |
| Diabetes mellitus                 | -               | -               | 2.9 (16)        | 13.2 (20)*       |
| Others                            | 17.6 (76)       | 17.0 (9)        | 16.6 (92)       | 17.1 (26)        |
| Transplant characteristics        |                 |                 |                 |                  |
| Transplant vintage (months)       | 15.0 (2.0-44.0) | 10.0 (1.0-34.0) | 14.0 (2.0-41.0) | 19.0 (0-39.0)    |
| Living donor (% , n)              | 35.2 (152)      | 37.7 (20)       | 39.2 (217)      | 16.4 (25)*       |
| Pre-emptive transplant (% , n)    | 17.4 (75)       | 15.1 (8)        | 18.1 (100)      | 8.6 (13)*        |
| Cold ischemia time (h)            | 15.2 (2.7-21.3) | 15.5 (2.6-24.0) | 14.5 (2.6-21.0) | 18.0 (2.7-24.0)* |
| Acute rejection                   | 24.8 (107)      | 22.6 (12)       | 25.8 (143)      | 30.3 (46)        |
| Calcineurin inhibitor             |                 |                 |                 |                  |
| Cyclosporine (% , n)              | 36.8 (159)      | 49.1 (26)       | 38.4 (213)      | 42.1 (64)        |
| Tacrolimus (% , n)                | 17.1 (74)       | 20.8 (11)       | 18.1 (100)      | 19.7 (30)        |
| Proliferation inhibitor           |                 |                 |                 |                  |
| Azathioprine (% , n)              | 19.0 (82)       | 15.1 (8)        | 17.5 (97)       | 17.1 (26)        |
| Mycophenolate (% , n)             | 66.7 (288)      | 60.4 (32)       | 67.9 (376)      | 57.2 (87)*       |
| Prednisolone dose (mg)            | 10.0 (7.5-10.0) | 10.0 (7.5-10.0) | 10.0 (7.5-10.0) | 10.0 (7.5-10.0)  |

Data are presented as mean ± SD or median (interquartile range) and percentage (number). SBP, systolic blood pressure; DBP, diastolic blood pressure; BMI, body mass index; HDL-C, high-density lipoprotein cholesterol; eGFR, estimated

glomerular filtration rate. Differences were tested by analysis of variance or Kruskal-Wallis for continuous variables and with  $\chi^2$  test for categorical variables.

\*  $p < 0.05$ .

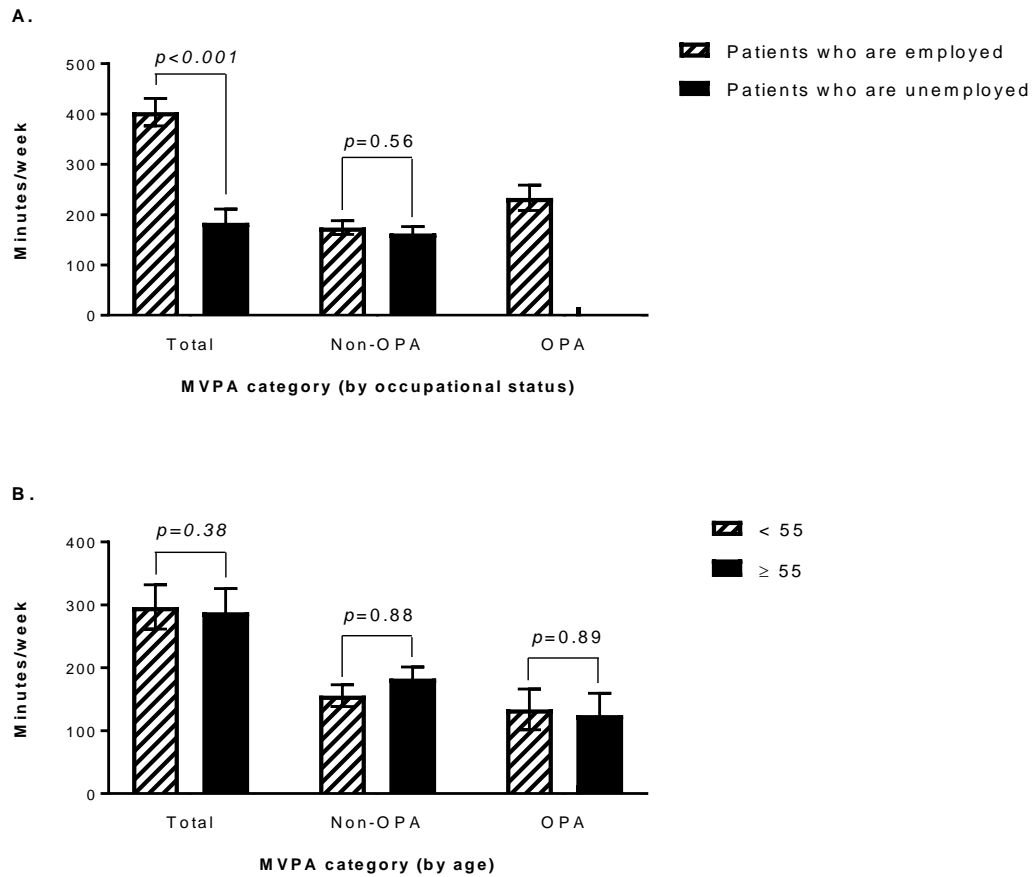

**Figure S1.** Level of daily-life PA according to occupational status (A) and age (B).
